# Supplementary material
Source: PubMed Central journal article supplement (PMC5512221)
Supplement: JB.00213-17_zjb999094482s1.pdf [file JB.00213-17_zjb999094482s1.pdf]

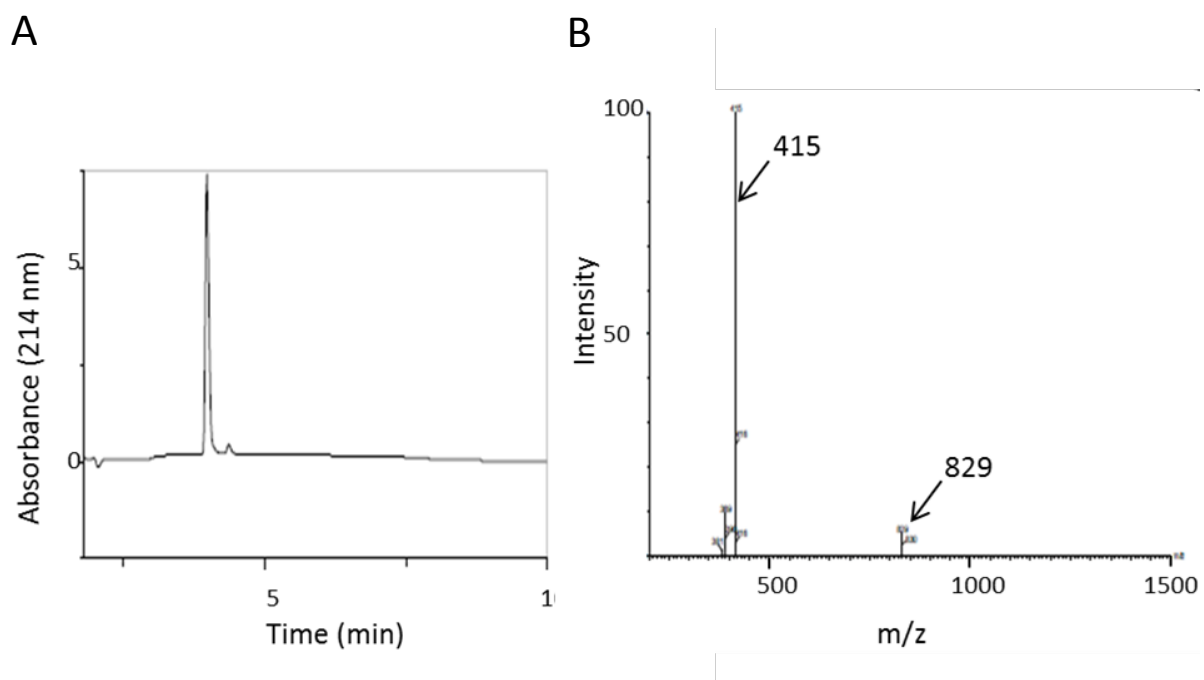

**Figure S1. Purification of the synthetic Dendritic Stimulating Peptide DSL-1.** A. The synthetic peptide was purified by RP-HPLC on a preparative-scale C18 column. B. The purity of synthetic DSL-1 was confirmed by ESI-MS. DSL-1 calculated molecular weight: 828 g/mol. Major peaks were detected for  $m/z=415$  and  $m/z=829$  corresponding to the expected  $m/z$  ratio for  $[M+H]^+$  and  $[M+2H]^{2+}$ , respectively.

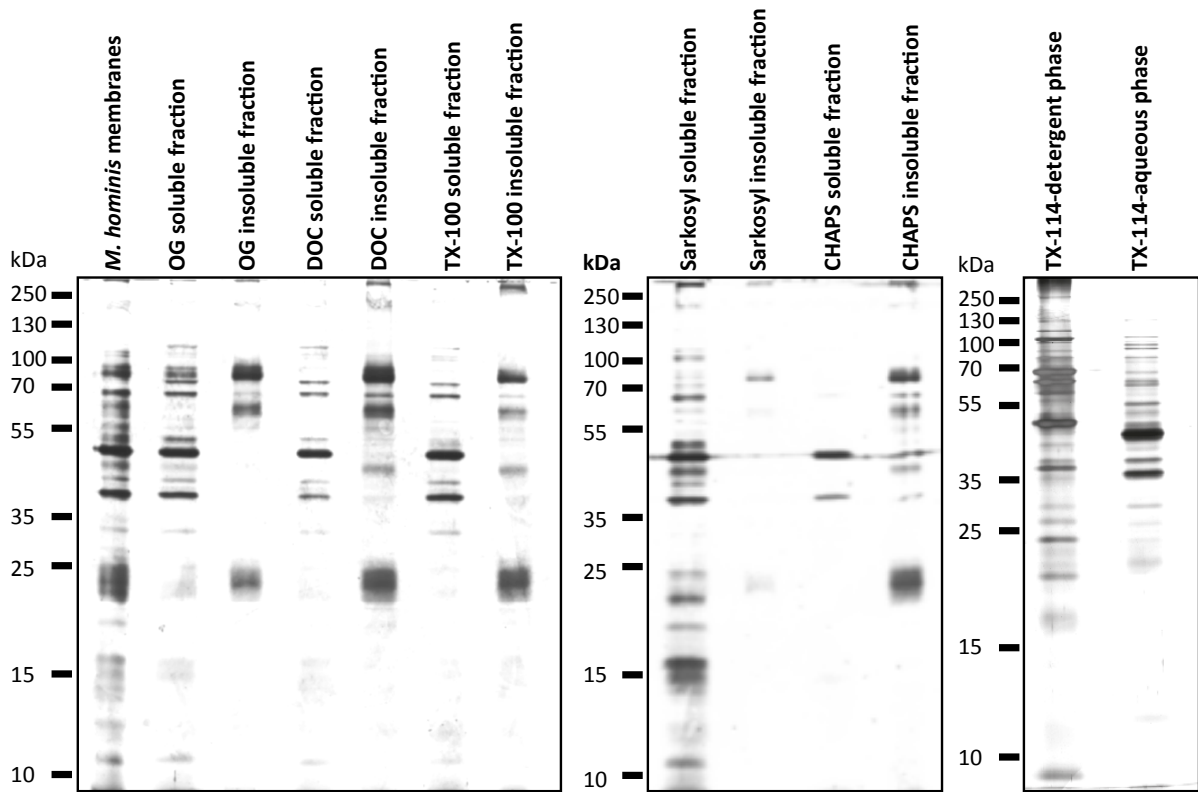

**Figure S2. SDS-PAGE of *M. hominis* PG21 proteins extracted using non-denaturing detergents.** Gel was colored by ProteoSilver Silver Stain kit. CHAPS, dimethylammonio-1-propanesulfonate ; DOC, Sodium Deoxycholate ; Sarkosyl , N-Lauroylsarcosine sodium salt ; OG, octyl glucopyranoside ; TX-100, Triton X-100 ; TX-114, Triton X-114.

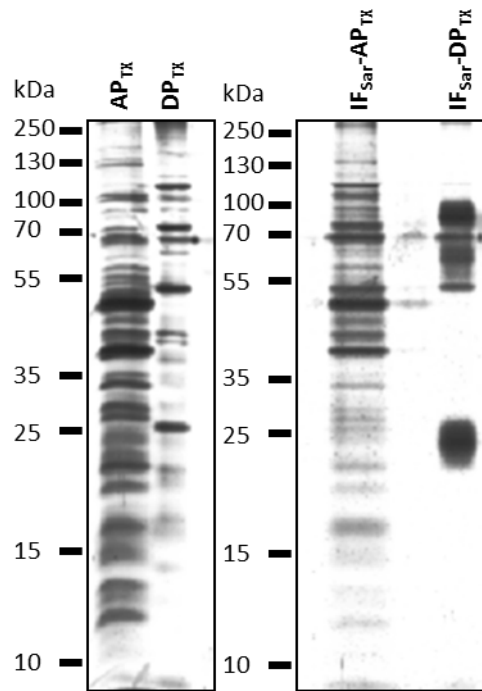

**Figure S3. SDS-PAGE of *M. hominis* PG21 proteins fractionated using only TX-114 or using sequential extraction by Sarkosyl followed by TX-114.** *Left panel:* Starting from 200  $\mu$ g of membrane proteins, proteins fractionated into an aqueous phase (AP<sub>TX</sub>) and a detergent-enriched phase (DP<sub>TX</sub>) using TX-114 were separated on a 12.5% acrylamide SDS-PAGE. *Right panel:* Starting from 200  $\mu$ g of membrane proteins, proteins insoluble in Sarkosyl (IF<sub>Sar</sub>) were further fractionated into an aqueous phase (IF<sub>Sar</sub>-AP<sub>TX</sub>) and a detergent-enriched phase (IF<sub>Sar</sub>-DP<sub>TX</sub>) using TX-114 before being separated on a 12.5% acrylamide SDS-PAGE. Gels were colored using ProteoSilver Silver Stain kit (Sigma-Aldrich).
